# Supplementary material for: Protein phosphatase 2A regulates senescence and immunogenicity in medulloblastoma models
Source: JCI journal article supplement (doi:10.1172/jci196753), 2026-04-23

Full unedited gel for Figure 2F

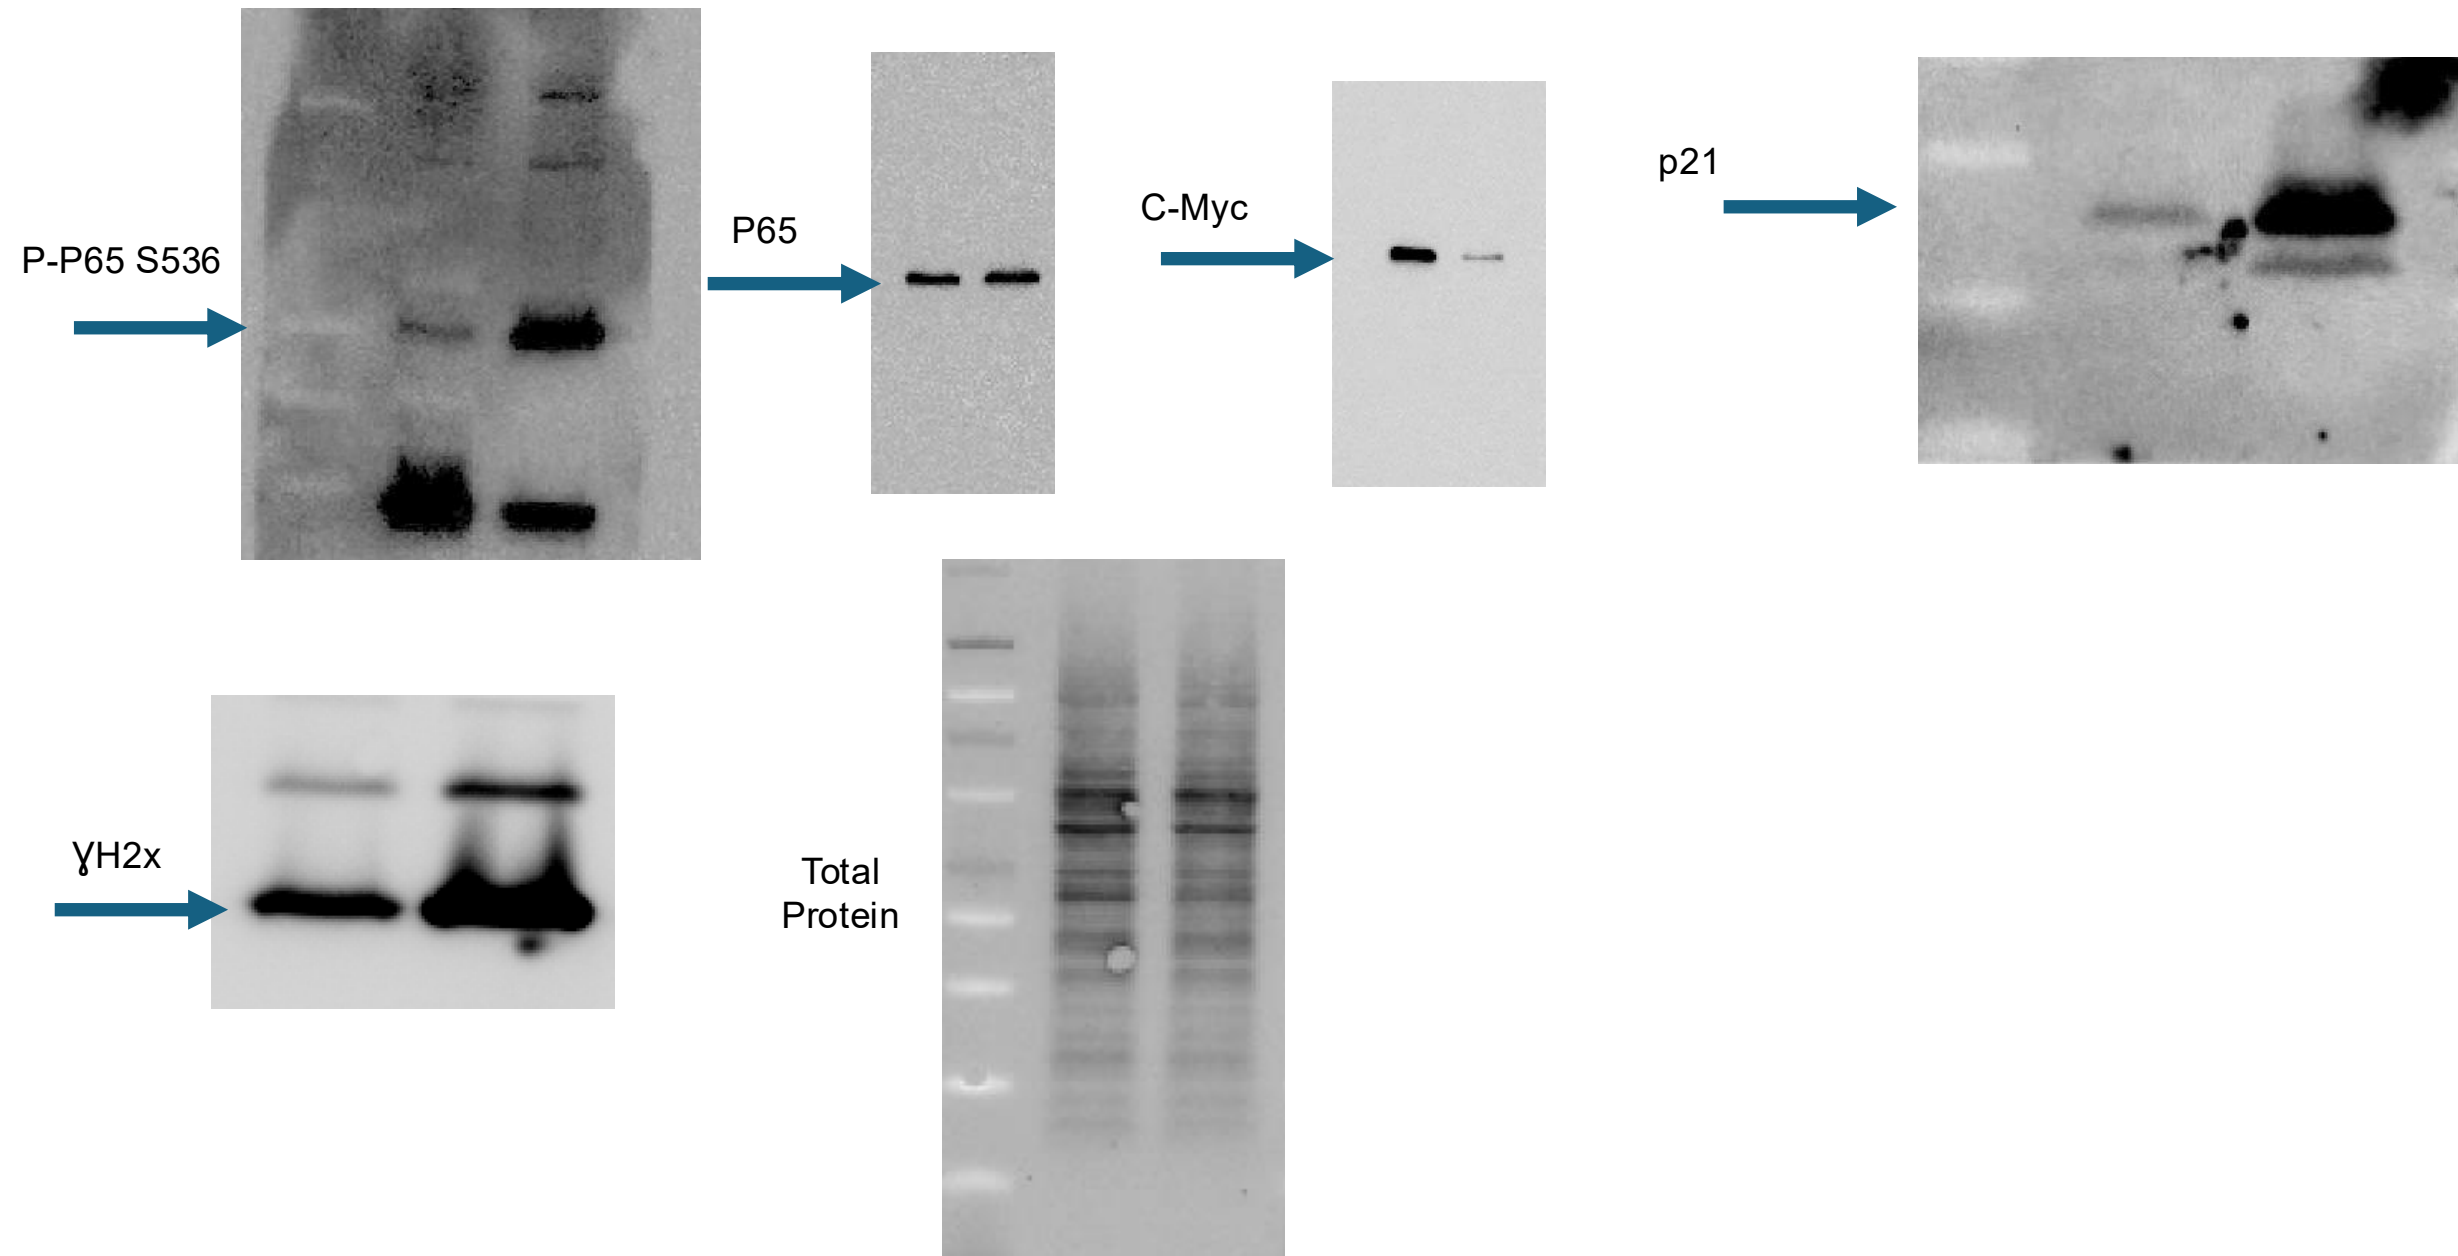

Full unedited gel for Figure 2I

Cas 9

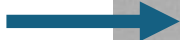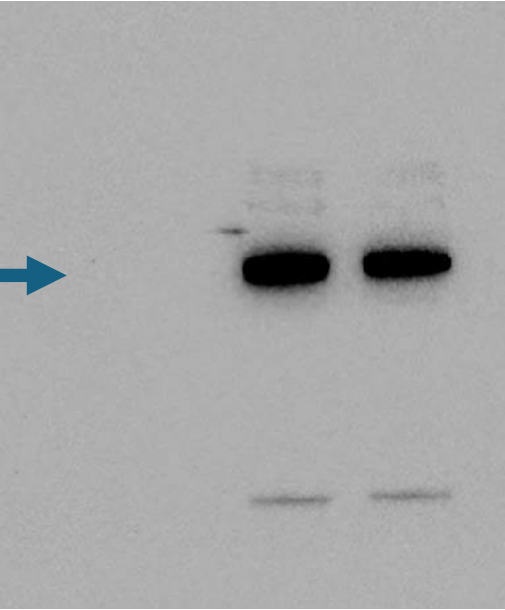

PP2Ac

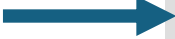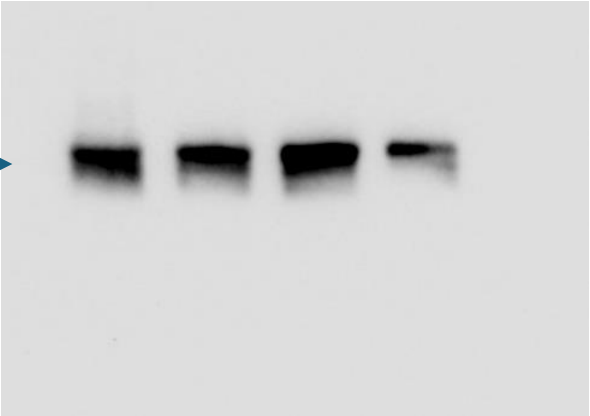

Total Protein

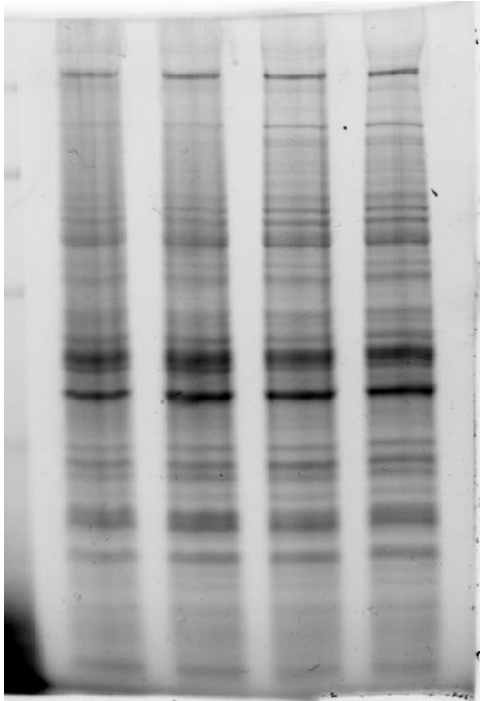

Full unedited gel for Figure 8E

P-P65 S536

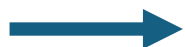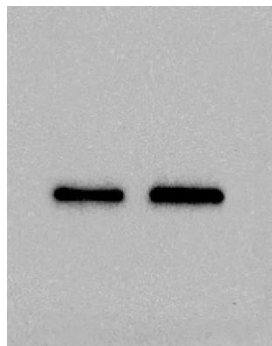

P65

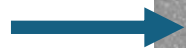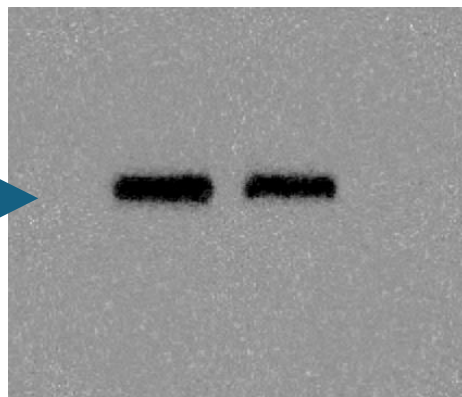

PP2Ac

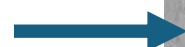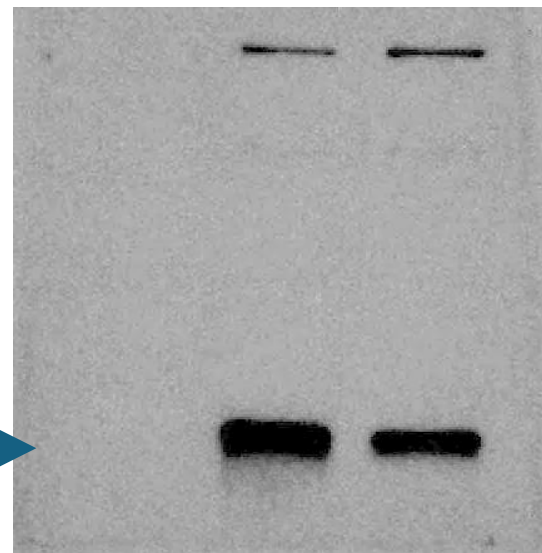

Total Protein

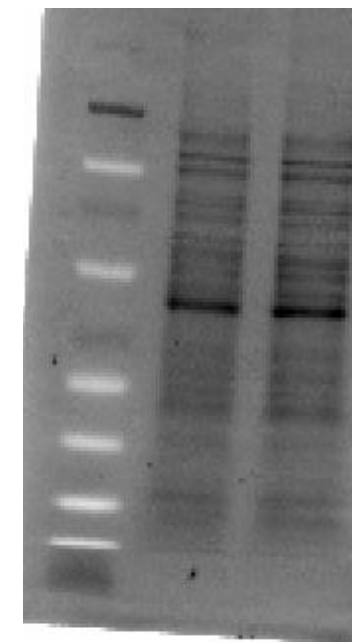

Full unedited gel for Figure S2A

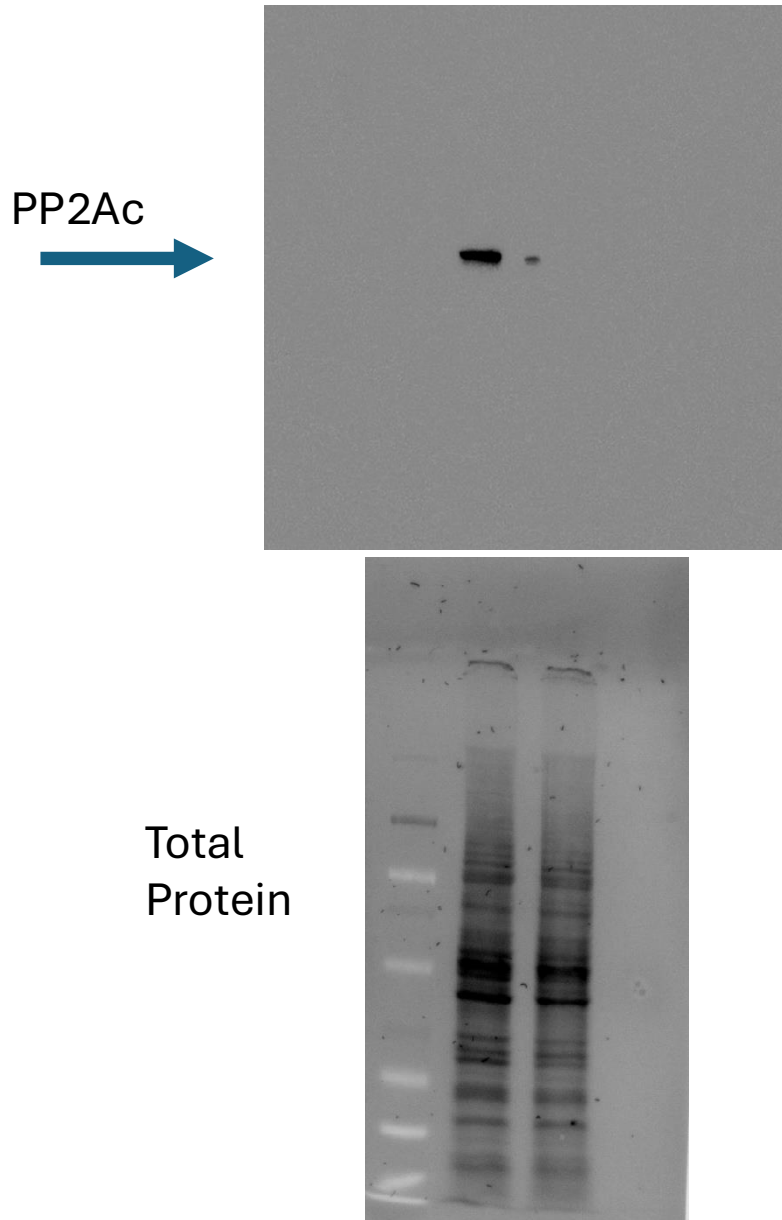

Full unedited gel for Figure S2B

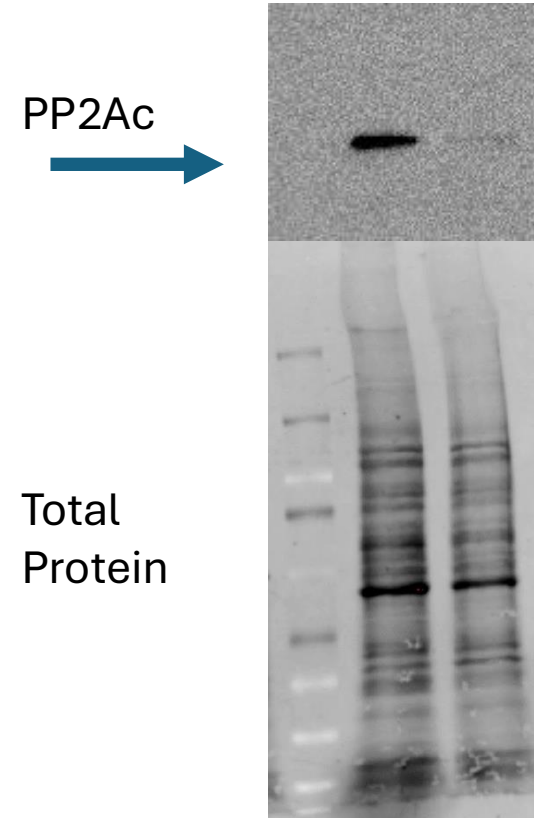

Indicates lanes shown in text

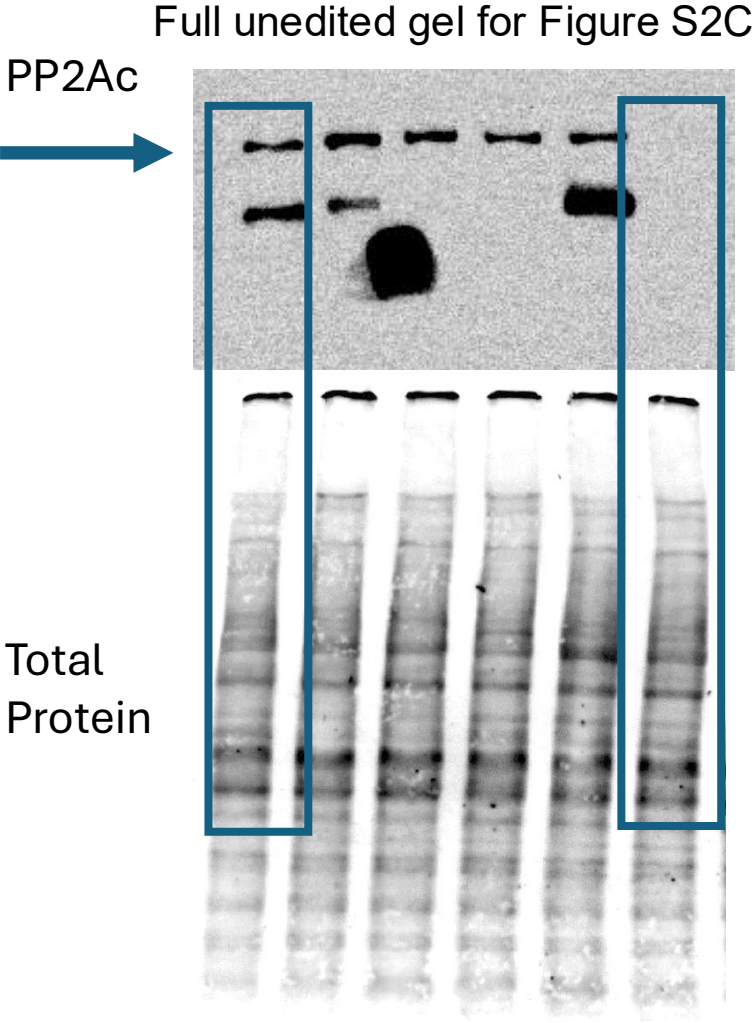

Full unedited gel for Figure S2D

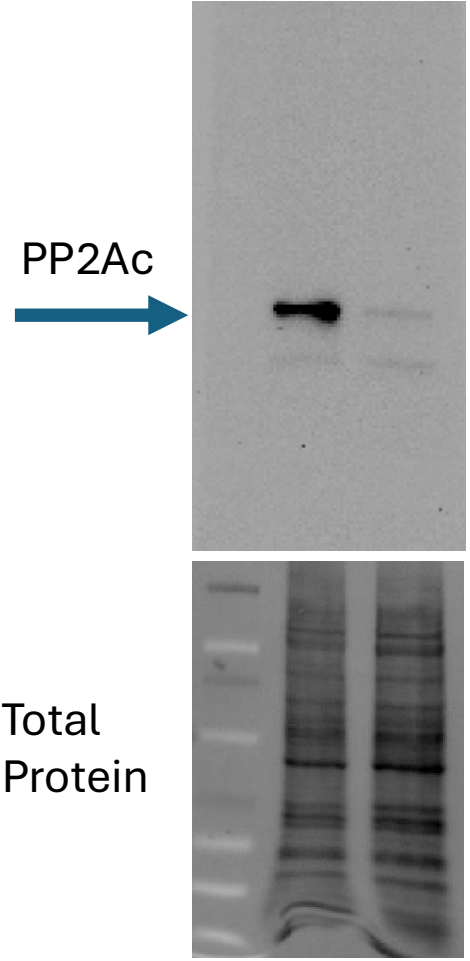

Indicates lanes shown in text

Full unedited gel for Figure S2E

PP2Ac

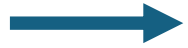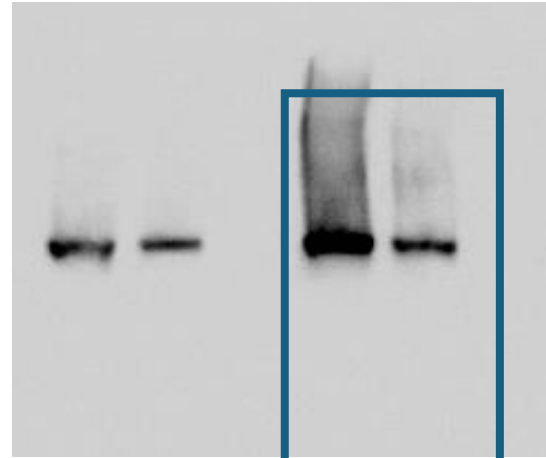

Total  
Protein

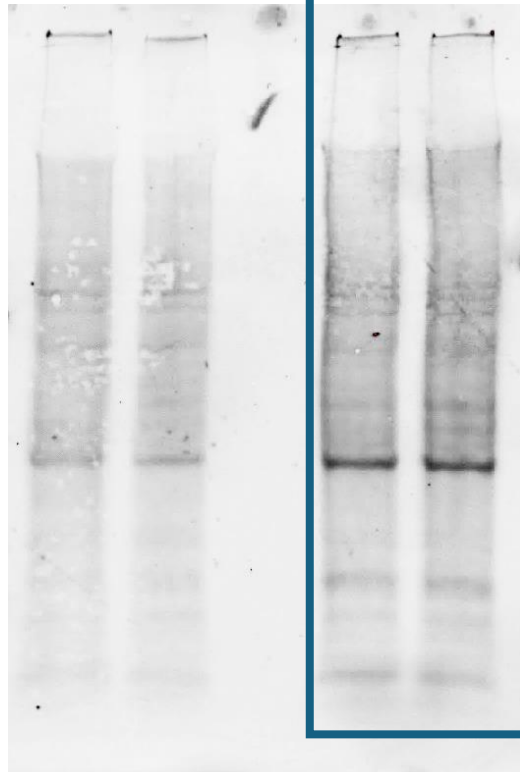

Full unedited gel for Figure S4

p-p65 (Ser536)

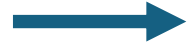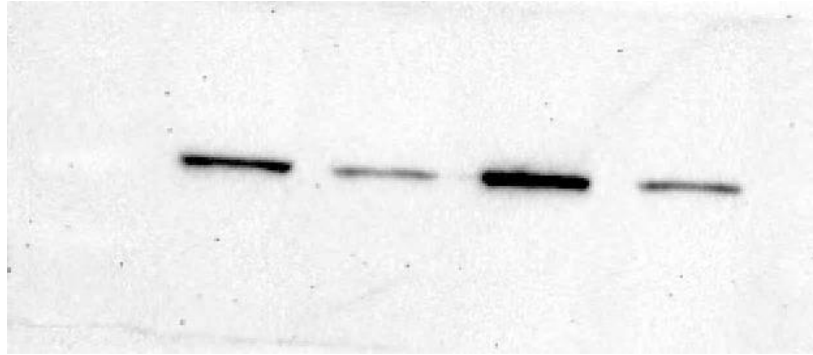

p65

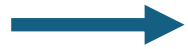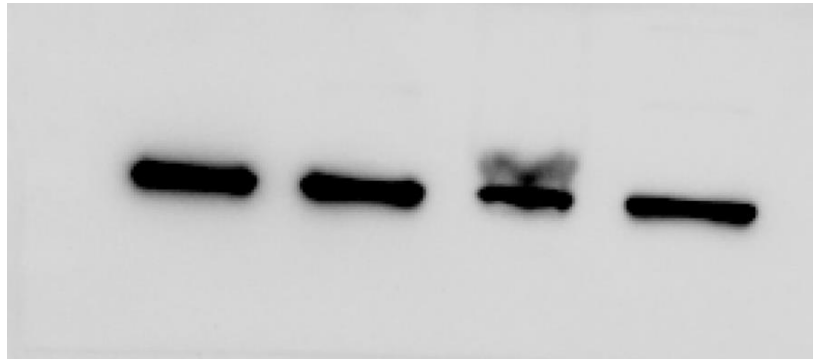

Total Protein

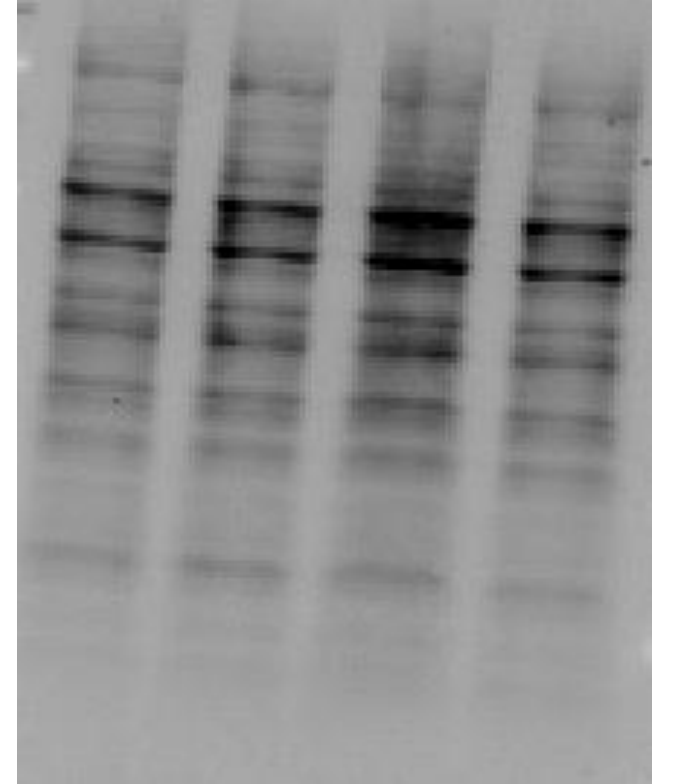

Full unedited gel for Figure S6C

p21

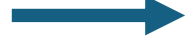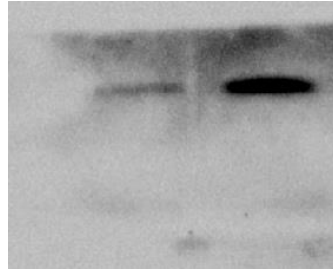

$\gamma$ H2x

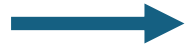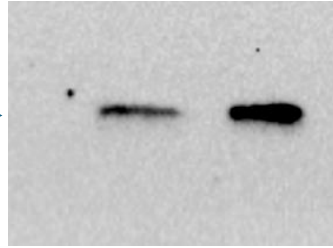

CycA

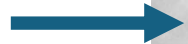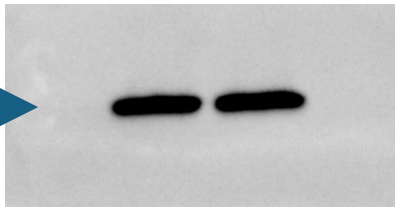

P-P65 S536

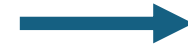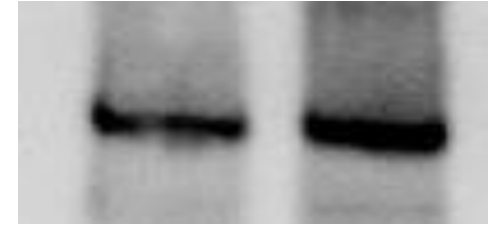

P65

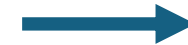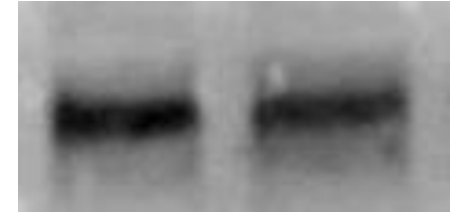

Supplement: sd2 [file 2]
